# Supplementary material
Source: PubMed Central journal article supplement (PMC4982467)
Supplement: NIHMS781870-supplement-supplemental_meterial.pdf [file NIHMS781870-supplement-supplemental_meterial.pdf]

## On-Line Data Supplement

### **Longitudinal patterns of blood pressure, incident cardiovascular events and all-cause mortality in normotensive diabetic persons**

**Authors:** Zhijun Wu<sup>1</sup>, Cheng Jin<sup>2</sup>, Anand Vaidya<sup>3</sup>, Wei Jin<sup>1</sup>, Zhe Huang<sup>2</sup>, Shouling Wu<sup>2</sup>, Xiang Gao<sup>4</sup>

#### **Affiliations:**

<sup>1</sup>Department of Cardiology, Ruijin Hospital, Shanghai Jiaotong University School of Medicine, Shanghai, People's Republic of China

<sup>2</sup> Department of Cardiology, Kailuan Hospital, Tangshan, People's Republic of China

<sup>3</sup> Division of Endocrinology, Diabetes, and Hypertension, Brigham and Women's Hospital and Harvard Medical School, Boston, MA

<sup>4</sup>Department of Nutritional Sciences, Pennsylvania State University, State college, PA

**Short title:** blood pressure and diabetes

**Content:** Supplementary Table S1-S5

Supplementary Figure S1-S3

**Table S1 Adjusted hazard ratios (HRs) and 95% confidence intervals (95% CIs)  
for all-cause mortality and primary cardiovascular outcomes based on blood  
pressure status at baseline (2006) during 2006-2014**

| Outcomes                     | BP<120/80 versus BP of 120-139/80-89mmHg , HR (95%CI) |                          |                          |                  |
|------------------------------|-------------------------------------------------------|--------------------------|--------------------------|------------------|
|                              | All-cause<br>mortality                                | Cardiovascular<br>events | Myocardial<br>infarction | Stroke           |
| Case number <sup>*</sup> , n | 81/166                                                | 40/137                   | 12/36                    | 28/106           |
| Model 1 <sup>†</sup>         | 1.46 (1.12-1.91)                                      | 0.85 (0.60-1.22)         | 1.02 (0.53-1.96)         | 0.76 (0.50-1.16) |
| Model 2 <sup>‡</sup>         | 1.42 (1.08-1.88)                                      | 0.84 (0.58-1.20)         | 0.99 (0.50-1.93)         | 0.75 (0.49-1.15) |
| Model 3 <sup>§</sup>         | 1.46 (1.10-1.93)                                      | 0.83 (0.58-1.19)         | 0.96 (0.49-1.88)         | 0.75 (0.49-1.14) |
| Sensitivity analysis         |                                                       |                          |                          |                  |
| Model 4 <sup>  </sup>        | 1.39 (0.99-1.95)                                      | 1.07 (0.71-1.62)         | 1.16 (0.56-2.40)         | 0.94 (0.57-1.55) |
| Model 5 <sup>¶</sup>         | 1.50 (1.12-2.01)                                      | 0.79 (0.54-1.16)         | 0.80 (0.39-1.66)         | 0.74 (0.47-1.17) |
| Model 6 <sup>#</sup>         | 1.49 (1.12-1.98)                                      | 0.81 (0.56-1.17)         | 0.96 (0.49-1.89)         | 0.72 (0.47-1.11) |

Abbreviations: BP, blood pressure; HR, hazard ratios; CI, confidence interval.

<sup>\*</sup>The case number in BP<120/80 group versus that in BP of 120-139/80-89mmHg group.

<sup>†</sup>Model1: adjusted for age, sex and glucose-lowering therapy.

<sup>‡</sup>Model2: adjustments as in model1 plus smoking status (never, former, occasional or daily smoker), body mass index, physical activity (inactive, moderately active or vigorously active), low density lipoprotein cholesterol (mg/dL), high density lipoprotein cholesterol (mg/dL), triglyceride (mg/dL) and high sensitivity C-reactive protein (mg/L).

§Model3: adjustments as in model2 plus alcohol consumption (never, former, occasional or daily), educational level (primary, middle/high school or college/university), occupation (white collar, coalminer or blue collar), fasting blood glucose and estimated Glomerular Filtration Rate (eGFR).

||Model4: adjusted for model3 after excluding individuals receiving glucose-lowering therapy.

¶Model5: adjusted for model3 after excluding individuals using lipid-lowering drugs.

#Model6: adjusted for model3 after excluding individuals with eGFR<30 ml/minute/1.73 m<sup>2</sup>.

**Table S2 Adjusted hazard ratios (HRs) and 95% confidence intervals (95% CIs)  
of change in blood pressure with risk of all-cause mortality during 2008-2014**

|                            | Change in BP status, mmHg (from 2006 to 2008), HR (95% CI) |                           |                      |                           |                          |                           |
|----------------------------|------------------------------------------------------------|---------------------------|----------------------|---------------------------|--------------------------|---------------------------|
|                            | Stable<br><120/80                                          | <120/80→<br>120-139/80-89 | <120/80→<br>≥140/90  | 120-139/80-89<br>→<120/80 | Stable 120-<br>139/80-89 | 120-139/80-89<br>→≥140/90 |
|                            | 12/200                                                     | 11/260                    | 8/148                | 17/236                    | 23/725                   | 40/742                    |
| Case<br>number/total,<br>n |                                                            |                           |                      |                           |                          |                           |
| Model 1*                   | 2.05 (1.01-<br>4.15)                                       | 1.39 (0.68-<br>2.85)      | 1.71 (0.76-<br>3.83) | 2.70 (1.44-<br>5.07)      | 1<br>(reference)         | 1.46 (0.88-<br>2.45)      |
| Model 2†                   | 2.44 (1.16-<br>5.12)                                       | 1.23 (0.58-<br>2.61)      | 1.79 (0.79-<br>4.06) | 2.81 (1.47-<br>5.37)      | 1<br>(reference)         | 1.55<br>(0.92-2.62)       |
| Model 3‡                   | 2.35 (1.10-<br>5.01)                                       | 1.29 (0.60-<br>2.77)      | 2.05 (0.89-<br>4.70) | 3.04 (1.56-<br>5.92)      | 1<br>(reference)         | 1.63<br>(0.96-2.77)       |
| Sensitivity analysis       |                                                            |                           |                      |                           |                          |                           |
| Model 4§                   | 0.92 (0.20-<br>4.25)                                       | 1.24 (0.44-<br>3.51)      | 3.05 (1.14-<br>8.18) | 2.75 (1.21-<br>6.24)      | 1<br>(reference)         | 1.65<br>(0.87-3.14)       |
| Model 5                    | 2.44 (1.08-<br>5.51)                                       | 1.21 (0.54-<br>2.70)      | 2.44 (1.04-<br>5.68) | 2.81 (1.38-<br>5.75)      | 1<br>(reference)         | 1.64 (0.95-<br>2.83)      |
| Model 6¶                   | 2.39 (1.09-<br>5.21)                                       | 1.36 (0.63-<br>2.93)      | 2.20 (0.95-<br>5.08) | 3.20 (1.63-<br>6.28)      | 1<br>(reference)         | 1.69 (0.98-<br>2.89)      |
| Model 7#                   | 1.95 (0.81-                                                | 1.43 (0.63-               | 2.14 (0.87-          | 3.89 (1.93-               | 1 (reference)            | 1.50 (0.84-               |

|            |             |             |             |             |               |             |
|------------|-------------|-------------|-------------|-------------|---------------|-------------|
|            | 4.69)       | 3.24)       | 5.23)       | 7.85)       |               | 2.70)       |
| Model 8**  | 1.61 (0.69- | 0.91 (0.38- | 2.02 (0.82- | 2.26 (1.09- | 1 (reference) | 1.23 (0.64- |
|            | 3.75)       | 2.17)       | 4.97)       | 4.71)       |               | 2.33)       |
| Model 9*** | 2.25 (1.05- | 1.36 (0.63- | 2.17 (0.95- | 2.89 (1.48- | 1 (reference) | 1.63 (0.96- |
|            | 4.86)       | 2.93)       | 4.98)       | 5.64)       |               | 2.77)       |

Abbreviations: BP, blood pressure; HR, hazard ratios; CI, confidence interval.

\*Model1: adjusted for age, sex and glucose-lowering therapy.

†Model2: adjustments as in model1 plus smoking status (never, former, occasional or daily smoker), body mass index, physical activity (inactive, moderately active or vigorously active), low density lipoprotein cholesterol (mg/dL), high density lipoprotein cholesterol (mg/dL), triglyceride (mg/dL) and high sensitivity C-reactive protein (mg/L).

‡Model3: adjustments as in model2 plus alcohol consumption (never, former, occasional or daily), educational level (primary, middle/high school or college/university), occupation (white collar, coalminer or blue collar), fasting blood glucose and estimated Glomerular Filtration Rate (eGFR).

§Model4: adjusted for model3 after excluding individuals receiving glucose-lowering therapy.

||Model5: adjusted for model3 after excluding individuals using lipid-lowering drugs.

¶Model6: adjusted for model3 after excluding individuals with eGFR<30 ml/minute/1.73 m<sup>2</sup>.

#Model7: adjusted for model3 after excluding individuals who suffered cardiovascular

diseases during 2008-2012.

\*\*Model8: adjusted for model3 after excluding individuals who developed hypertension during 2008-2012.

\*\*\*Model9: adjusted for model3 after excluding individuals who with hypotension (SBP<90mmHg or DBP<60mmHg).

**Table S3 Adjusted hazard ratios (HRs) and 95% confidence intervals (95% CIs)  
of change in blood pressure with risk of primary cardiovascular outcomes  
during 2008-2014**

|                      | Change in BP status, mmHg (from 2006 to 2008), HR (95% CI) |                      |                      |                      |                  |                      |
|----------------------|------------------------------------------------------------|----------------------|----------------------|----------------------|------------------|----------------------|
|                      | Stable                                                     | <120/80→             | <120/80→             | 120-139/80-89        | Stable 120-      | 120-139/80-89        |
|                      | <120/80                                                    | 120-139/80-89        | ≥140/90              | →<120/80             | 139/80-89        | →≥140/90             |
| Case                 | 7/200                                                      | 8/260                | 8/148                | 9/236                | 28/725           | 55/742               |
| number/total,<br>n   |                                                            |                      |                      |                      |                  |                      |
| Model 1*             | 0.97 (0.42-<br>2.23)                                       | 0.82 (0.37-<br>1.81) | 1.38 (0.63-<br>3.04) | 1.03 (0.49-<br>2.18) | 1<br>(reference) | 1.81 (1.15-<br>2.86) |
| Model 2†             | 1.04 (0.44-<br>2.45)                                       | 0.81 (0.37-<br>1.79) | 1.38 (0.62-<br>3.05) | 0.97 (0.45-<br>2.07) | 1<br>(reference) | 1.89<br>(1.19-3.02)  |
| Model 3‡             | 1.06 (0.45-<br>2.50)                                       | 0.84 (0.38-<br>1.87) | 1.46 (0.65-<br>3.29) | 0.99 (0.46-<br>2.12) | 1<br>(reference) | 1.98<br>(1.24-3.17)  |
| Sensitivity analysis |                                                            |                      |                      |                      |                  |                      |
| Model 4§             | 1.11 (0.31-<br>3.97)                                       | 1.54 (0.65-<br>3.65) | 3.09 (1.29-<br>7.40) | 1.00 (0.36-<br>2.77) | 1<br>(reference) | 2.28<br>(1.27-4.09)  |
| Model 5              | 0.62 (0.21-<br>1.82)                                       | 0.86 (0.38-<br>1.92) | 1.56 (0.69-<br>3.53) | 1.03 (0.48-<br>2.23) | 1<br>(reference) | 1.85 (1.14-<br>3.00) |
| Model 6¶             | 0.91 (0.37-<br>2.27)                                       | 0.84 (0.38-<br>1.86) | 1.47 (0.65-<br>3.31) | 0.98 (0.46-<br>2.11) | 1<br>(reference) | 1.99 (1.24-<br>3.18) |

Abbreviations: BP, blood pressure; HR, hazard ratios; CI, confidence interval.

\*Model1: adjusted for age, sex and glucose-lowering therapy.

†Model2: adjustments as in model1 plus smoking status (never, former, occasional or daily smoker), body mass index, physical activity (inactive, moderately active or vigorously active), low density lipoprotein cholesterol (mg/dL), high density lipoprotein cholesterol (mg/dL), triglyceride (mg/dL) and high sensitivity C-reactive protein (mg/L).

‡Model3: adjustments as in model2 plus alcohol consumption (never, former, occasional or daily), educational level (primary, middle/high school or college/university), occupation (white collar, coalminer or blue collar), fasting blood glucose and estimated Glomerular Filtration Rate (eGFR).

§Model4: adjusted for model3 after excluding individuals receiving glucose-lowering therapy.

||Model5: adjusted for model3 after excluding individuals using lipid-lowering drugs.

¶Model6: adjusted for model3 after excluding individuals with eGFR<30 ml/minute/1.73 m<sup>2</sup>.



**Table S4 Adjusted hazard ratios (HRs) and 95% confidence intervals (95% CIs) of change in blood pressure with risk of myocardial infarction during 2008-2014**

|                      | Change in BP status, mmHg (from 2006 to 2008), HR (95% CI) |                           |                      |                           |                          |                           |
|----------------------|------------------------------------------------------------|---------------------------|----------------------|---------------------------|--------------------------|---------------------------|
|                      | Stable<br><120/80                                          | <120/80→<br>120-139/80-89 | <120/80→<br>≥140/90  | 120-139/80-89<br>→<120/80 | Stable 120-<br>139/80-89 | 120-139/80-89<br>→≥140/90 |
|                      | Case<br>number/total,<br>n                                 | 2/200                     | 2/260                | 1/148                     | 0/236                    | 6/725                     |
| Model 1*             | 1.42 (0.28-<br>7.12)                                       | 0.99 (0.20-<br>4.93)      | 0.85 (0.10-<br>7.05) | —                         | 1<br>(reference)         | 2.67 (1.05-<br>6.78)      |
| Model 2†             | 1.87 (0.36-<br>9.82)                                       | 0.94 (0.19-<br>4.73)      | 0.82 (0.10-<br>6.91) | —                         | 1<br>(reference)         | 2.84<br>(1.10-7.37)       |
| Model 3‡             | 1.69 (0.31-<br>9.11)                                       | 0.76 (0.14-<br>4.24)      | 0.68 (0.07-<br>6.59) | —                         | 1<br>(reference)         | 3.34<br>(1.27-8.83)       |
| Sensitivity analysis |                                                            |                           |                      |                           |                          |                           |
| Model 4§             | 4.69 (0.68-<br>32.5)                                       | 2.17 (0.33-<br>14.1)      | 2.14 (0.21-<br>22.4) | —                         | 1<br>(reference)         | 5.15<br>(1.40-19.0)       |
| Model 5              | 0.65 (0.07-<br>5.95)                                       | 0.78 (0.14-<br>4.39)      | 0.69 (0.07-<br>6.58) | —                         | 1<br>(reference)         | 3.16 (1.18-<br>8.42)      |
| Model 6¶             | 1.69 (0.31-<br>9.10)                                       | 0.76 (0.14-<br>4.23)      | 0.67 (0.07-<br>6.54) | —                         | 1<br>(reference)         | 3.33 (1.26-<br>8.80)      |

Abbreviations: BP, blood pressure; HR, hazard ratios; CI, confidence interval.

\*Model1: adjusted for age, sex and glucose-lowering therapy.

†Model2: adjustments as in model1 plus smoking status (never, former, occasional or daily smoker), body mass index, physical activity (inactive, moderately active or vigorously active), low density lipoprotein cholesterol (mg/dL), high density lipoprotein cholesterol (mg/dL), triglyceride (mg/dL) and high sensitivity C-reactive protein (mg/L).

‡Model3: adjustments as in model2 plus alcohol consumption (never, former, occasional or daily), educational level (primary, middle/high school or college/university), occupation (white collar, coalminer or blue collar), fasting blood glucose and estimated Glomerular Filtration Rate (eGFR).

§Model4: adjusted for model3 after excluding individuals receiving glucose-lowering therapy.

||Model5: adjusted for model3 after excluding individuals using lipid-lowering drugs.

¶Model6: adjusted for model3 after excluding individuals with eGFR<30 ml/minute/1.73 m<sup>2</sup>.

**Table S5 Adjusted hazard ratios (HRs) and 95% confidence intervals (95% CIs)  
of change in blood pressure with risk of stroke during 2008-2014**

| Case                 | Change in BP status, mmHg (from 2006 to 2008), HR (95% CI) |                           |                      |                           |                          |                           |
|----------------------|------------------------------------------------------------|---------------------------|----------------------|---------------------------|--------------------------|---------------------------|
|                      | Stable<br><120/80                                          | <120/80→<br>120-139/80-89 | <120/80→<br>≥140/90  | 120-139/80-89<br>→<120/80 | Stable 120-<br>139/80-89 | 120-139/80-89<br>→≥140/90 |
|                      | 5/200                                                      | 6/260                     | 7/148                | 9/236                     | 24/725                   | 40/742                    |
| number/total,<br>n   |                                                            |                           |                      |                           |                          |                           |
| Model 1*             | 0.78 (0.30-<br>2.06)                                       | 0.72 (0.29-<br>1.75)      | 1.39 (0.60-<br>3.23) | 1.20<br>(0.56-2.59)       | 1<br>(reference)         | 1.51 (0.91-<br>2.50)      |
| Model 2†             | 0.82 (0.30-<br>2.21)                                       | 0.70 (0.28-<br>1.73)      | 1.40 (0.60-<br>3.29) | 1.13<br>(0.52-2.47)       | 1<br>(reference)         | 1.57<br>(0.94-2.65)       |
| Model 3‡             | 0.86 (0.32-<br>2.33)                                       | 0.75 (0.30-<br>1.87)      | 1.53 (0.65-<br>3.64) | 1.17 (0.53-<br>2.58)      | 1<br>(reference)         | 1.65<br>(0.97-2.78)       |
| Sensitivity analysis |                                                            |                           |                      |                           |                          |                           |
| Model 4§             | 0.45 (0.06-<br>3.51)                                       | 1.44 (0.54-<br>3.81)      | 3.17 (1.23-<br>8.18) | 1.16 (0.41-<br>3.30)      | 1<br>(reference)         | 1.74<br>(0.90-3.37)       |
| Model 5              | 0.54 (0.16-<br>1.87)                                       | 0.77 (0.31-<br>1.91)      | 1.66 (0.69-<br>3.99) | 1.25 (0.56-<br>2.75)      | 1<br>(reference)         | 1.50 (0.87-<br>2.58)      |
| Model 6¶             | 0.69 (0.23-<br>2.05)                                       | 0.75 (0.30-<br>1.86)      | 1.55 (0.65-<br>3.68) | 1.16<br>(0.53-2.55)       | 1<br>(reference)         | 1.65 (0.97-<br>2.78)      |

Abbreviations: BP, blood pressure; HR, hazard ratios; CI, confidence interval.

\*Model1: adjusted for age, sex and glucose-lowering therapy.

†Model2: adjustments as in model1 plus smoking status (never, former, occasional or daily smoker), body mass index, physical activity (inactive, moderately active or vigorously active), low density lipoprotein cholesterol (mg/dL), high density lipoprotein cholesterol (mg/dL), triglyceride (mg/dL) and high sensitivity C-reactive protein (mg/L).

‡Model3: adjustments as in model2 plus alcohol consumption (never, former, occasional or daily), educational level (primary, middle/high school or college/university), occupation (white collar, coalminer or blue collar), fasting blood glucose and estimated Glomerular Filtration Rate (eGFR).

§Model4: adjusted for model3 after excluding individuals receiving glucose-lowering therapy.

||Model5: adjusted for model3 after excluding individuals using lipid-lowering drugs.

¶Model6: adjusted for model3 after excluding individuals with eGFR<30 ml/minute/1.73 m<sup>2</sup>.

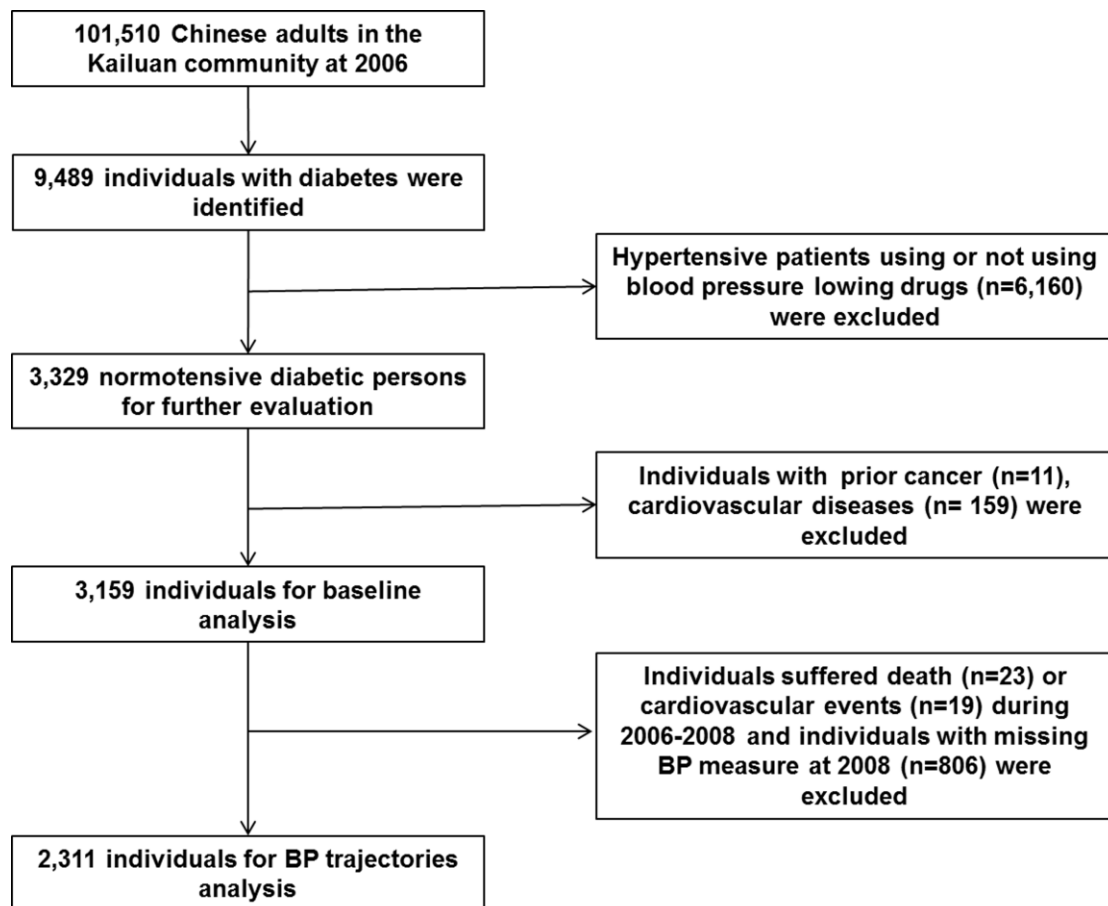

**Figure S1** Flow chart of the participants with diabetes utilized in this study.

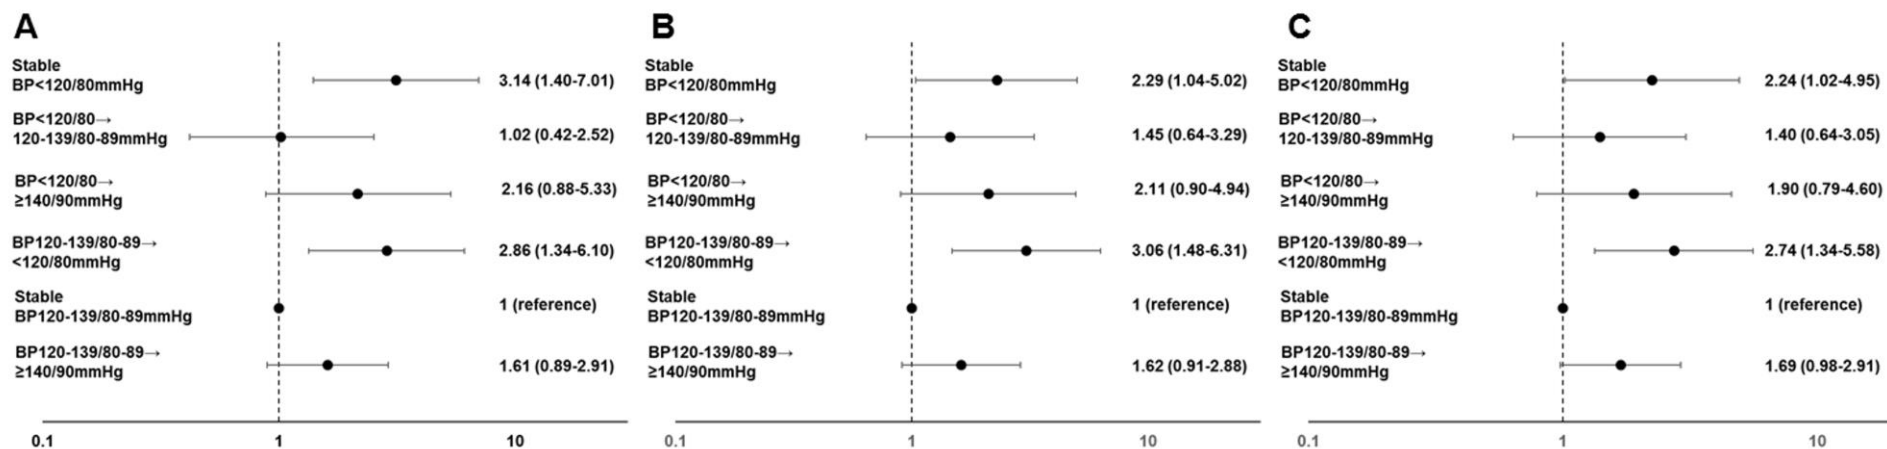

**Figure S2 Adjusted hazard ratios (HRs) and 95% confidence intervals (95% CIs) of all-cause mortality during 2008-2014 according to blood pressure trajectories from 2006 to 2008 after exclusion of new onset cancers (Figure S2A), annual weight loss >5% from 2006 to 2008 (Figure S2B) and body mass index <18.5 kg/m<sup>2</sup> at baseline (Figure S2C). All models were adjusted for age (years), sex, smoking status (never, former, occasional or daily), glucose-lowering therapy, body mass index (kg/m<sup>2</sup>), high density lipoprotein cholesterol (mmol/L), low density lipoprotein cholesterol (mmol/L), triglyceride (mmol/L), alcohol consumption (never, former, occasional or daily), educational level (primary, middle/high school or college/university), occupation (white collar, coalminer or blue collar), physical activity (inactive, moderately**

active or vigorously active), high sensitivity C-reactive protein (mg/L), fasting blood glucose (mmol/L) and estimated Glomerular Filtration Rate (eGFR)( mL/min/1.73m<sup>2</sup>).

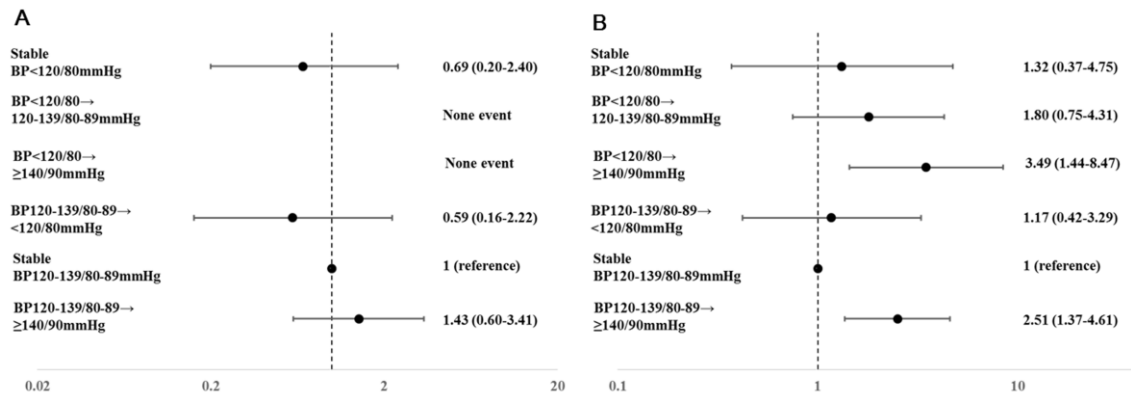

**Figure S3 Adjusted hazard ratios (HRs) and 95% confidence intervals (95% CIs) of cardiovascular events during 2008-2014 according to blood pressure trajectories from 2006 to 2008 in individuals diagnosed prior to recruitment (Figure S3A) and in undiagnosed diabetic persons (Figure S3B).** Primary cardiovascular outcomes included fatal or non-fatal myocardial infarction events and fatal or non-fatal stroke events. All models were adjusted for age (years), sex, smoking status (never, former, occasional or daily), glucose-lowering therapy, body mass index (kg/m<sup>2</sup>), high density lipoprotein cholesterol (mmol/L), low density lipoprotein cholesterol (mmol/L), triglyceride (mmol/L), alcohol consumption (never, former, occasional or daily), educational level (primary, middle/high school or college/university), occupation (white collar, coalminer or blue collar), physical activity (inactive, moderately active or vigorously active), high sensitivity C-reactive protein (mg/L), fasting blood glucose (mmol/L) and estimated Glomerular Filtration Rate (eGFR)( mL/min/1.73m<sup>2</sup>).
